# Supplementary material for: Strain-Specific Responses in Microalgal Lipid Production: Revealing the Impact of Light, Temperature, and Nitrogen Stressors on Nannochloropsis and Microchloropsis
Source: Research Square preprint supplement (doi:10.21203/rs.3.rs-4217667/v1), 2024-04-15

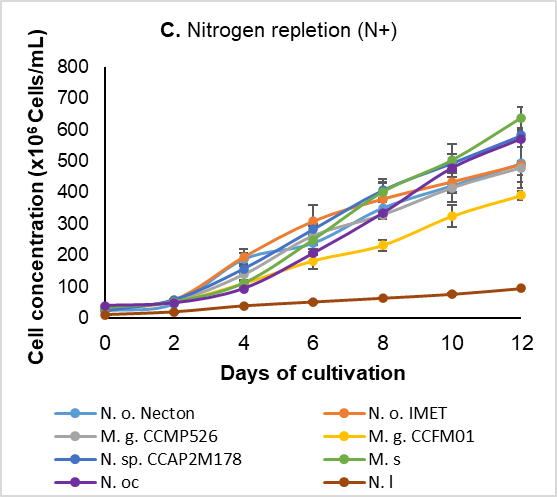

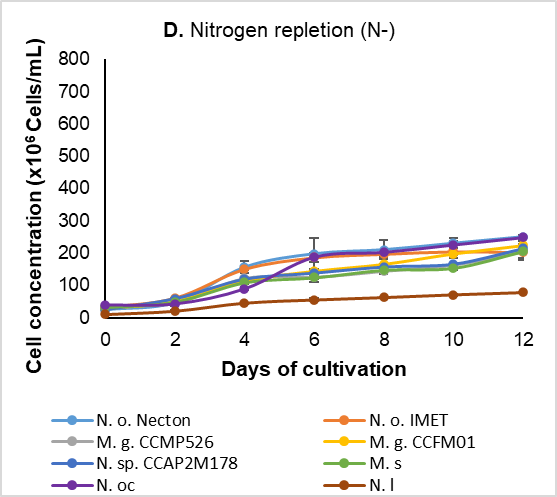

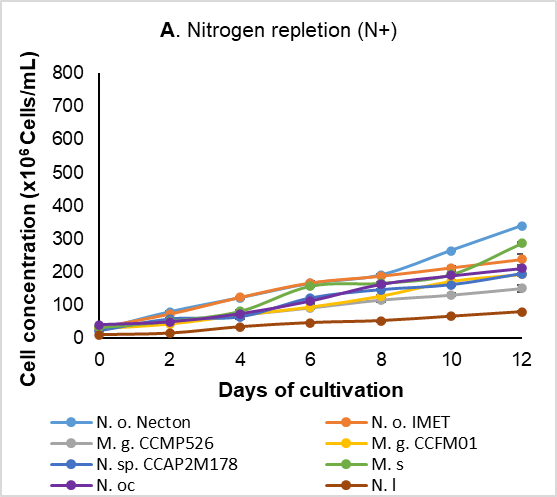

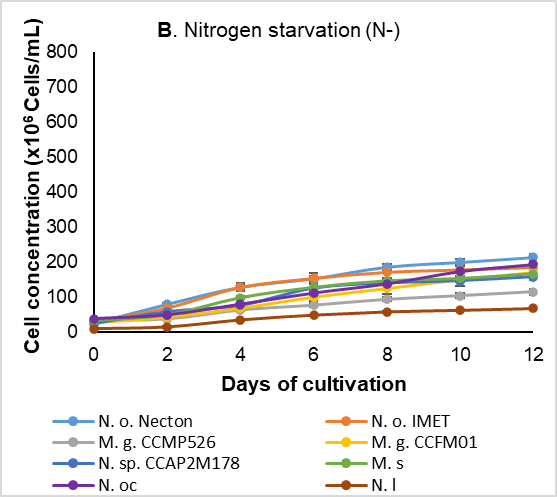


**Fig.1S.** Cell concentration (x106 Cells/mL) of different *Nannochloropsis* and Microchloropsis species cultivated in nitrogen repletion (N+) and nitrogen starvation (N-) conditions under low light intensity 150 μmol.m−2.s−1 **(A & B)** and high light intensity 600 μmol.m−2.s−1 **(C & D).**


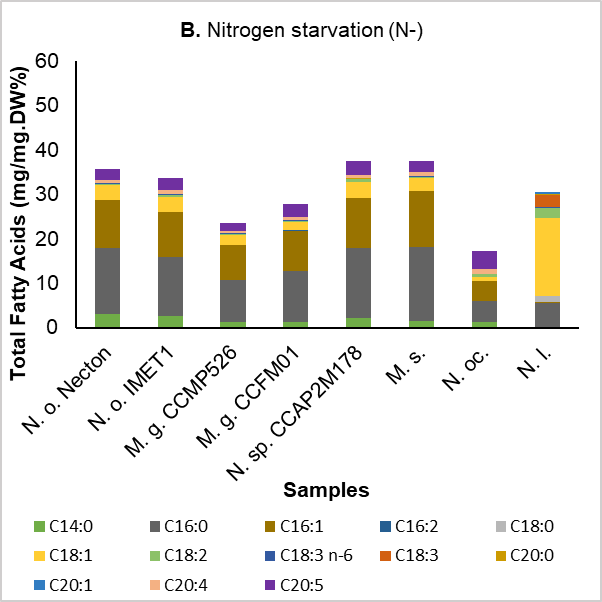

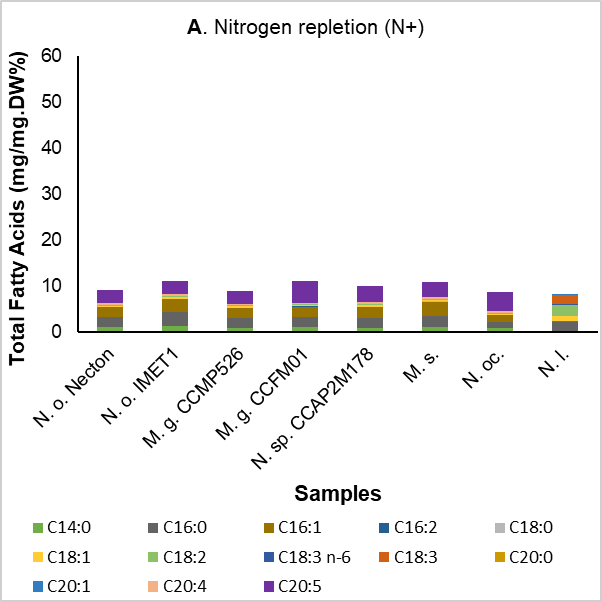

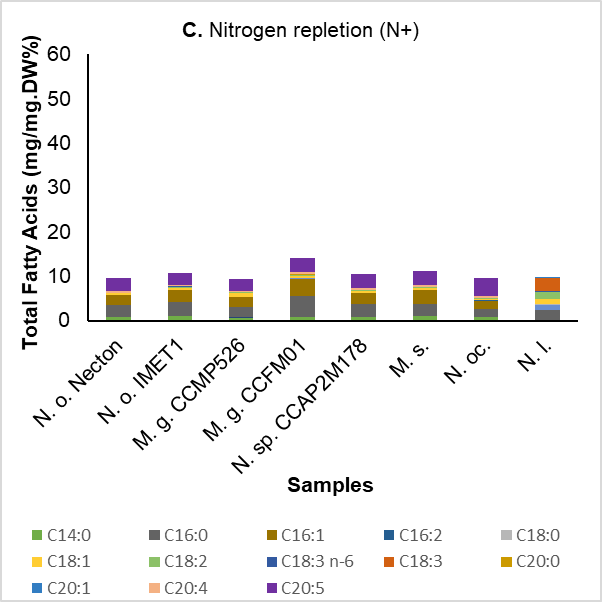

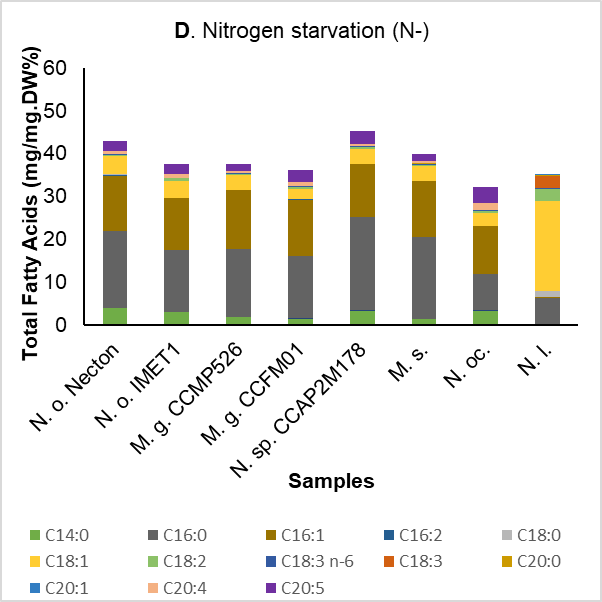


**Fig 2S.** Fatty acids composition of different *Nannochloropsis* and Microchloropsis species cultivated in nitrogen repletion (N+) and nitrogen starvation (N-) conditions under low light intensity 150 μmol.m−2.s−1 **(A & B)** and high light intensity 600 μmol.m−2.s−1 **(C & D).**


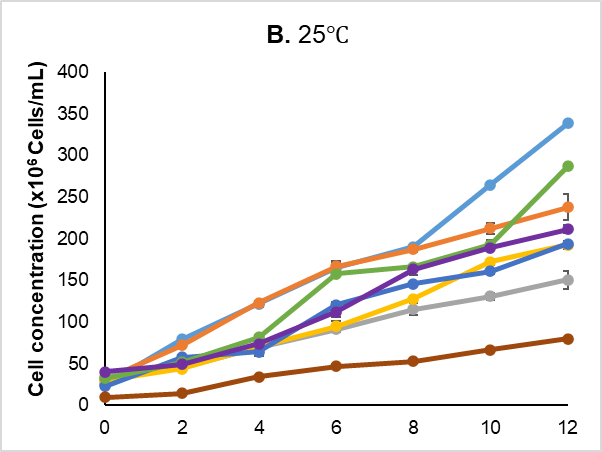

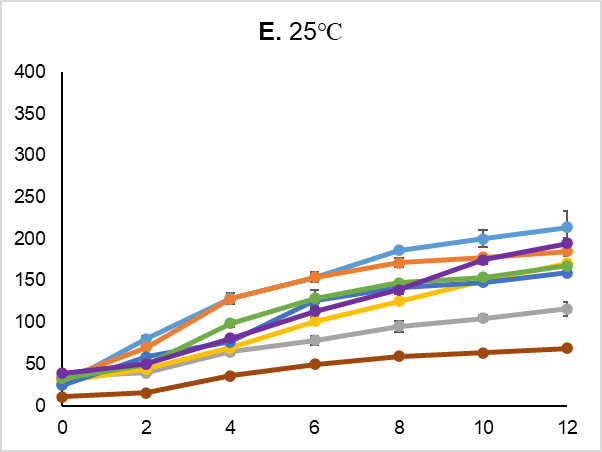

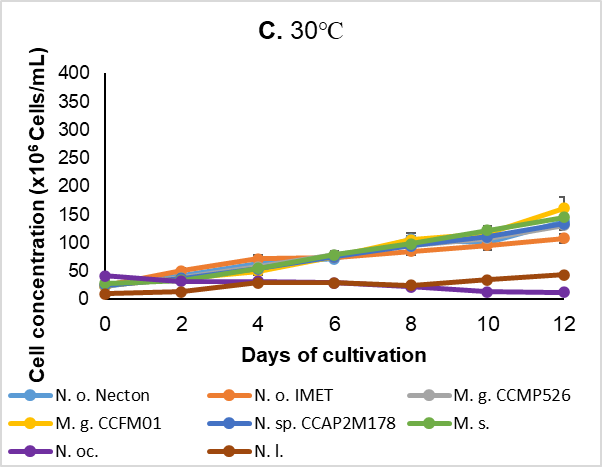

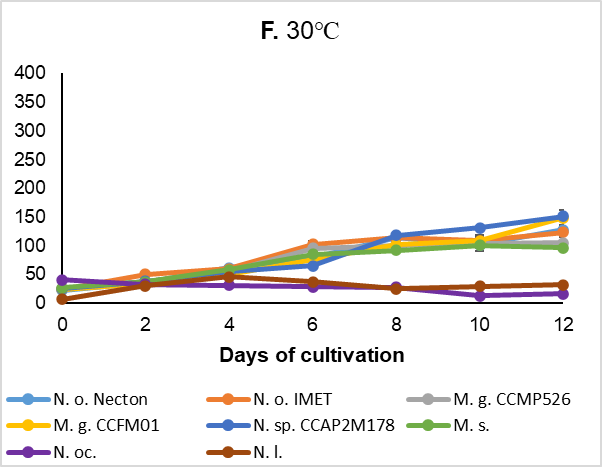

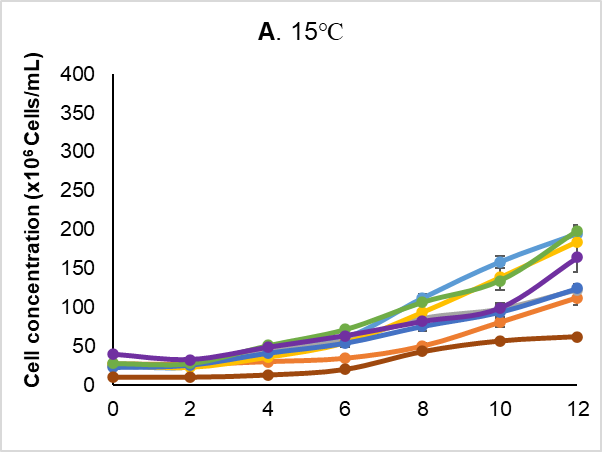

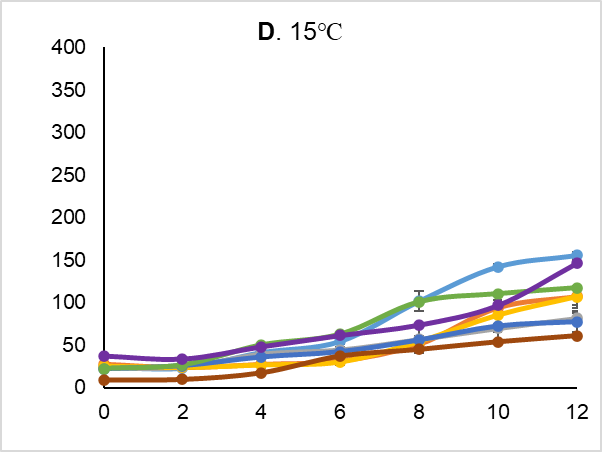


**Fig.3S.** Cell concentration (x106 Cells/mL) of different *Nannochloropsis* and *Microchloropsis* species cultivated under different temperatures 15, 25, and 30℃ on the growth of different Microalgal species cultivated under nitrogen repletion (N+) **(A, B, and C)** and nitrogen starvation (N-) **(D, E, and F)** conditions.


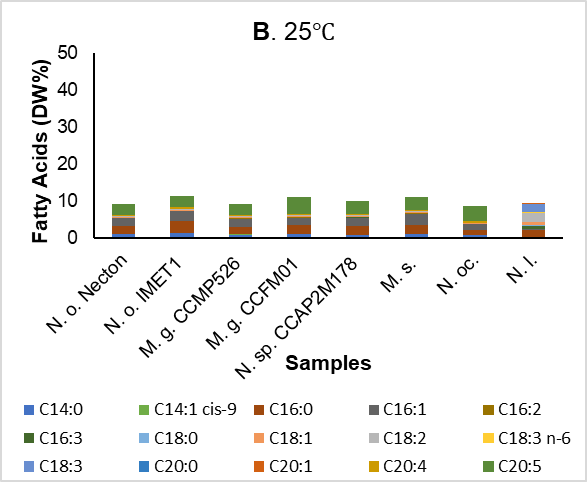

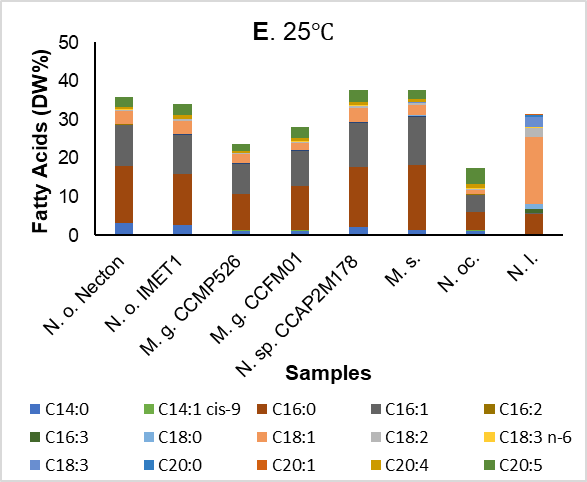

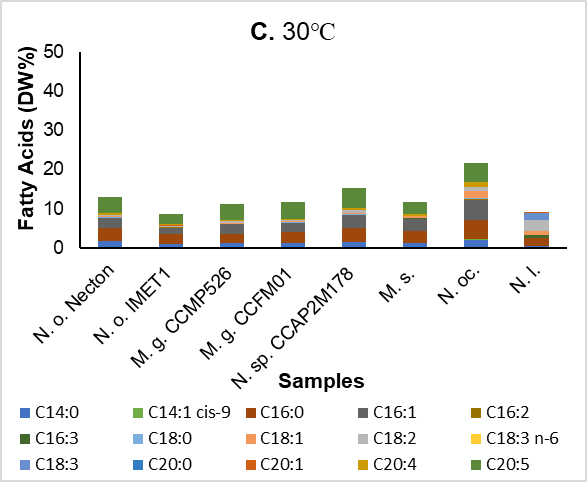

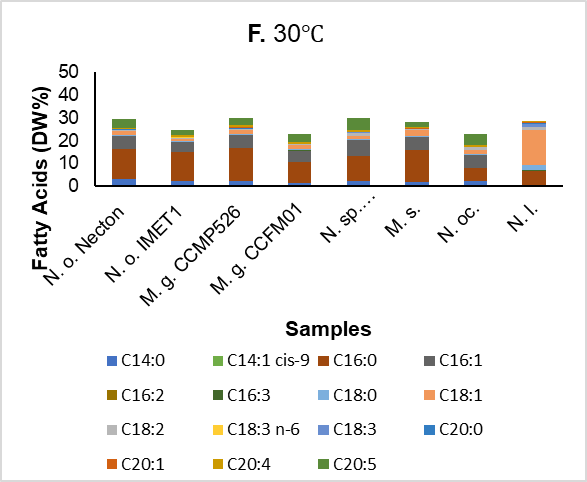

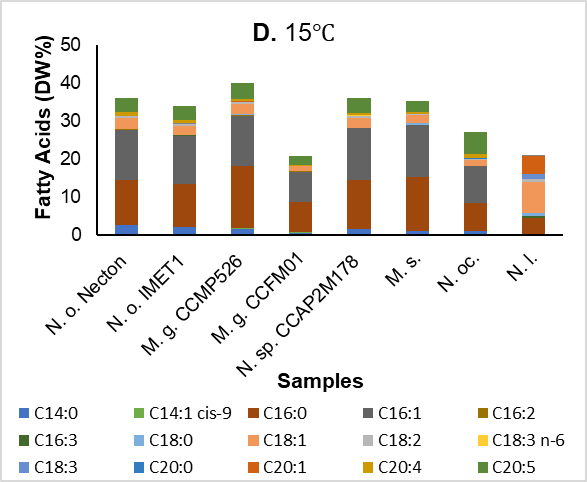

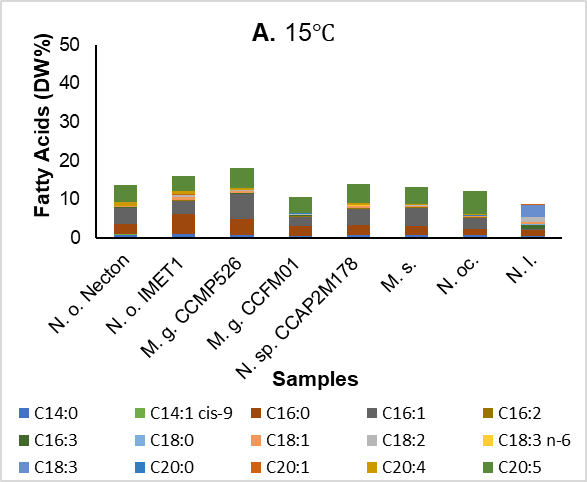


**Fig 4S.** Fatty acids composition of different *Nannochloropsis* and *Microchloropsis* species cultivated under different temperatures 15, 25, and 30℃ cultivated under N+ **(A, B and C)** and N- **(D, E and F)** conditions.

**Fig. 5S.** MUFAs, SFAs and PUFAs of different *Nannochloropsis* and *Microchloropsis* species cultivated under different temperatures 15, 25, and 30℃ cultivated under N+ **(A)** and N- **(B)** conditions.


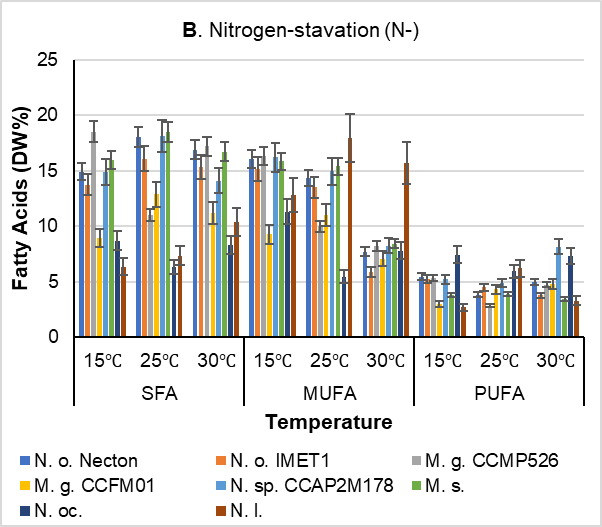

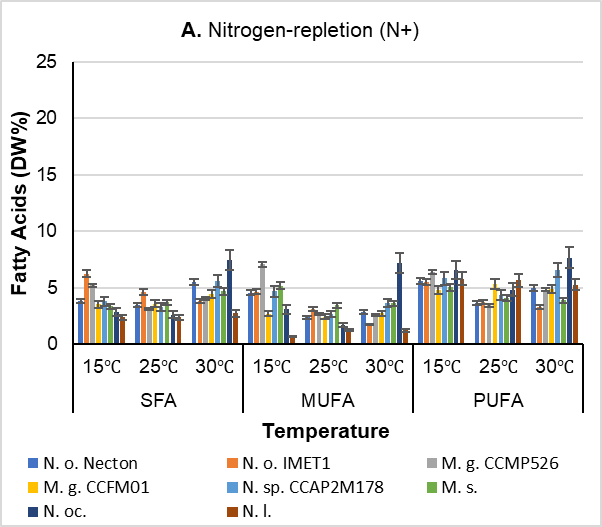

Supplement: Supplementary file 1 [file 962226164e320c0b345132be.docx]
